# Supplementary material for: Base-triggerable lauryl sarcosinate–dodecyl sulfate catanionic liposomes: structure, biophysical characterization, and drug entrapment/release studies
Source: Royal Society of Chemistry journal article supplement (doi:10.1039/d2sm00965j), 2022-01-01
Supplement: d2sm00965j1.pdf [file d2sm00965j1.pdf]

## Supporting Information

to

**Base-triggerable lauryl sarcosinate-dodecyl sulfate catanionic liposomes.**

**Structure, biophysical characterization, and drug entrapment/release  
studies**

Chinapaka Ravindar,<sup>#</sup> S. Thirupathi Reddy,<sup>#</sup> D. Sivaramakrishna,<sup>#</sup> Deepthi Priyanka Damera

Musti J. Swamy\*

*School of Chemistry, University of Hyderabad, Hyderabad 500 046, India.*

Running title: 'Base-triggerable' lauryl sarcosinate-dodecyl sulfate catanionic liposomes

\*Corresponding author:

Prof. Musti J. Swamy, School of Chemistry, University of Hyderabad, Hyderabad - 500 046,

India, Tel: +91-40-2301-1071; E-mail: [mjswamy@uohyd.ac.in](mailto:mjswamy@uohyd.ac.in), [mjswamy1@gmail.com](mailto:mjswamy1@gmail.com);

Website: <http://chemistry.uohyd.ac.in/~mjs/>

**Table S1.** Fractional atomic coordinates ( $\times 10^4$ ) and equivalent isotropic displacement parameters ( $\text{\AA}^2 \times 10^3$ ) of the LS-DS complex.  $U(\text{eq})$  is defined as one third of the trace of the orthogonalized  $U_{ij}$  tensor. [ $U(\text{eq}) = \frac{1}{3} \sum_i \sum_j U_{ij} a_i^* a_j^* a_i a_j \cos(a_i, a_j)$ ].

| Atom  | X       | Y       | Z        | U (eq) |
|-------|---------|---------|----------|--------|
| S(1)  | 5765(1) | 7507(1) | 10492(1) | 44(1)  |
| O(1)  | 5729(1) | 8619(3) | 10762(1) | 71(1)  |
| O(2)  | 5780(1) | 5654(3) | 10554(1) | 76(1)  |
| O(3)  | 5448(1) | 7940(3) | 10221(1) | 74(1)  |
| O(4)  | 6223(1) | 8097(3) | 10394(1) | 62(1)  |
| O(5)  | 5453(1) | 4224(3) | 9727(1)  | 56(1)  |
| O(6)  | 6052(1) | 2527(3) | 9778(1)  | 48(1)  |
| N(1)  | 5183(1) | 3016(4) | 10272(1) | 43(1)  |
| C(1)  | 6364(1) | 7304(5) | 10111(1) | 61(1)  |
| C(2)  | 6778(1) | 8156(5) | 10044(1) | 60(1)  |
| C(3)  | 6952(1) | 7457(4) | 9747(1)  | 58(1)  |
| C(4)  | 7378(1) | 8255(5) | 9678(1)  | 58(1)  |
| C(5)  | 7547(1) | 7576(5) | 9378(1)  | 59(1)  |
| C(6)  | 7972(1) | 8376(5) | 9305(1)  | 61(1)  |
| C(7)  | 8140(1) | 7675(5) | 9006(1)  | 63(1)  |
| C(8)  | 8568(1) | 8441(5) | 8931(1)  | 67(1)  |
| C(9)  | 8735(1) | 7687(5) | 8636(1)  | 73(1)  |
| C(10) | 9164(1) | 8378(6) | 8558(1)  | 90(1)  |
| C(11) | 9327(2) | 7553(8) | 8270(1)  | 124(2) |
| C(12) | 9739(2) | 8240(9) | 8176(1)  | 168(3) |
| C(13) | 5001(1) | 2073(4) | 10539(1) | 58(1)  |
| C(14) | 5566(1) | 2177(4) | 10161(1) | 46(1)  |
| C(15) | 5679(1) | 3115(4) | 9866(1)  | 39(1)  |
| C(16) | 6167(1) | 3255(4) | 9477(1)  | 48(1)  |
| C(17) | 6599(1) | 2513(4) | 9414(1)  | 47(1)  |
| C(18) | 6733(1) | 3236(5) | 9103(1)  | 51(1)  |
| C(19) | 7174(1) | 2586(4) | 9028(1)  | 49(1)  |
| C(20) | 7313(1) | 3365(4) | 8722(1)  | 53(1)  |
| C(21) | 7749(1) | 2661(5) | 8641(1)  | 54(1)  |
| C(22) | 7896(1) | 3443(5) | 8339(1)  | 57(1)  |
| C(23) | 8331(1) | 2720(5) | 8258(1)  | 59(1)  |
| C(24) | 8476(1) | 3498(5) | 7956(1)  | 65(1)  |
| C(25) | 8911(1) | 2792(6) | 7877(1)  | 73(1)  |
| C(26) | 9054(1) | 3603(7) | 7576(1)  | 99(2)  |
| C(27) | 9486(2) | 2945(9) | 7495(1)  | 157(3) |

**Table S2.** Bond lengths and bond angles of the LS-DS complex.

| Bond lengths (Å) |          | Bond angles (degrees) |            |
|------------------|----------|-----------------------|------------|
| S(1)-O(1)        | 1.419(2) | O(1)-S(1)-O(2)        | 116.07(15) |
| S(1)-O(2)        | 1.417(2) | O(1)-S(1)-O(3)        | 112.47(15) |
| S(1)-O(3)        | 1.439(2) | O(1)-S(1)-O(4)        | 101.68(13) |
| S(1)-O(4)        | 1.577(2) | O(2)-S(1)-O(3)        | 111.67(16) |
| O(5)-C(15)       | 1.190(3) | O(2)-S(1)-O(4)        | 108.34(14) |
| O(6)-C(15)       | 1.321(3) | O(3)-S(1)-O(4)        | 105.48(14) |
| O(6)-C(16)       | 1.456(3) | O(4)-C(1)-C(2)        | 109.1(3)   |
| N(1)-C(14)       | 1.460(4) | O(5)-C(15)-O(6)       | 124.8(3)   |
| N(1)-C(13)       | 1.488(4) | O(5)-C(15)-C(14)      | 123.6(3)   |
| C(1)-O(4)        | 1.438(3) | O(6)-C(15)-C(14)      | 111.6(2)   |
| C(1)-C(2)        | 1.479(4) | O(6)-C(16)-C(17)      | 109.2(2)   |
| C(2)-C(3)        | 1.508(4) | C(15)-O(6)-C(16)      | 115.3(2)   |
| C(3)-C(4)        | 1.498(4) | C(14)-N(1)-C(13)      | 115.1(2)   |
| C(4)-C(5)        | 1.507(4) | N(1)-C(14)-C(15)      | 109.5(2)   |
| C(5)-C(6)        | 1.501(4) | C(1)-O(4)-S(1)        | 117.85(19) |
| C(6)-C(7)        | 1.507(4) | C(1)-C(2)-C(3)        | 113.8(3)   |
| C(7)-C(8)        | 1.501(4) | C(2)-C(3)-C(4)        | 115.1(3)   |
| C(8)-C(9)        | 1.507(4) | C(3)-C(4)-C(5)        | 115.0(3)   |
| C(9)-C(10)       | 1.489(5) | C(4)-C(5)-C(6)        | 115.5(3)   |
| C(10)-C(11)      | 1.496(5) | C(5)-C(6)-C(7)        | 115.0(3)   |
| C(11)-C(12)      | 1.461(6) | C(6)-C(7)-C(8)        | 115.9(3)   |
| C(14)-C(15)      | 1.500(4) | C(7)-C(8)-C(9)        | 114.9(3)   |
| C(16)-C(17)      | 1.491(4) | C(8)-C(9)-C(10)       | 116.6(3)   |
| C(17)-C(18)      | 1.514(4) | C(9)-C(10)-C(11)      | 115.1(4)   |
| C(18)-C(19)      | 1.507(4) | C(10)-C(11)-C(12)     | 117.1(5)   |
| C(19)-C(20)      | 1.515(4) | C(16)-C(17)-C(18)     | 111.0(2)   |
| C(20)-C(21)      | 1.516(4) | C(17)-C(18)-C(19)     | 114.2(2)   |
| C(21)-C(22)      | 1.511(4) | C(18)-C(19)-C(20)     | 113.8(3)   |
| C(22)-C(23)      | 1.516(4) | C(19)-C(20)-C(21)     | 113.8(3)   |
| C(23)-C(24)      | 1.510(4) | C(22)-C(21)-C(20)     | 114.6(3)   |
| C(24)-C(25)      | 1.510(4) | C(21)-C(22)-C(23)     | 114.2(3)   |
| C(25)-C(26)      | 1.514(5) | C(22)-C(23)-C(24)     | 114.0(3)   |
| C(26)-C(27)      | 1.493(6) | C(23)-C(24)-C(25)     | 114.0(3)   |
|                  |          | C(24)-C(25)-C(26)     | 113.3(3)   |
|                  |          | C(25)-C(26)-C(27)     | 114.4(4)   |

**Table S3.** Torsion angles (degrees) of the LS-DS complex.

---

|     |     |     |     |           |
|-----|-----|-----|-----|-----------|
| S1  | O4  | C1  | C2  | 174.7(2)  |
| O1  | S1  | O4  | C1  | -176.6(2) |
| O2  | S1  | O4  | C1  | 60.6(2)   |
| O3  | S1  | O4  | C1  | -59.1(2)  |
| C3  | C2  | C1  | O4  | -178.7(3) |
| C16 | O6  | C15 | O5  | -3.6(4)   |
| O5  | C15 | C14 | N1  | -8.4(4)   |
| O6  | C15 | C14 | N1  | 173.1(2)  |
| C16 | O6  | C15 | C14 | 174.9(2)  |
| C18 | C17 | C16 | O6  | -179.9(2) |
| C15 | O6  | C16 | C17 | 178.4(2)  |
| C13 | N1  | C14 | C15 | 172.5(2)  |
| C1  | C2  | C3  | C4  | -178.3(3) |
| C3  | C4  | C5  | C6  | 179.5(3)  |
| C4  | C5  | C6  | C7  | 179.5(3)  |
| C5  | C4  | C3  | C2  | -179.0(3) |
| C5  | C6  | C7  | C8  | -179.2(3) |
| C9  | C8  | C7  | C6  | 178.5(3)  |
| C7  | C8  | C9  | C10 | -178.5(3) |
| C8  | C9  | C10 | C11 | 177.9(4)  |
| C9  | C10 | C11 | C12 | 177.5(4)  |
| C16 | C17 | C18 | C19 | 178.3(2)  |
| C17 | C18 | C19 | C20 | -178.0(2) |
| C21 | C20 | C19 | C18 | -178.0(3) |
| C19 | C20 | C21 | C22 | -179.1(3) |
| C23 | C22 | C21 | C20 | -179.6(3) |
| C21 | C22 | C23 | C24 | 179.7(3)  |
| C25 | C24 | C23 | C22 | 179.4(3)  |
| C23 | C24 | C25 | C26 | -179.3(3) |
| C24 | C25 | C26 | C27 | 179.3(4)  |

---

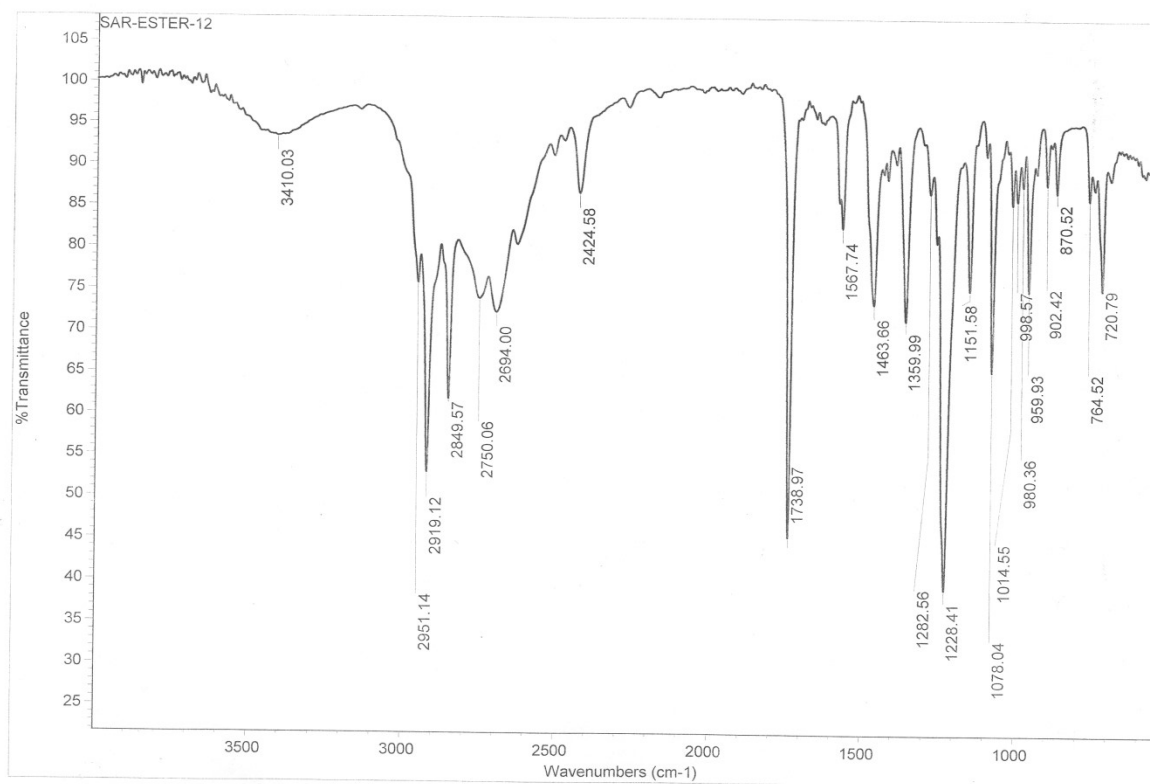

**Fig. S1.** FTIR spectrum of lauryl sarcosinate hydrochloride (KBr pellet), recorded at room temperature.

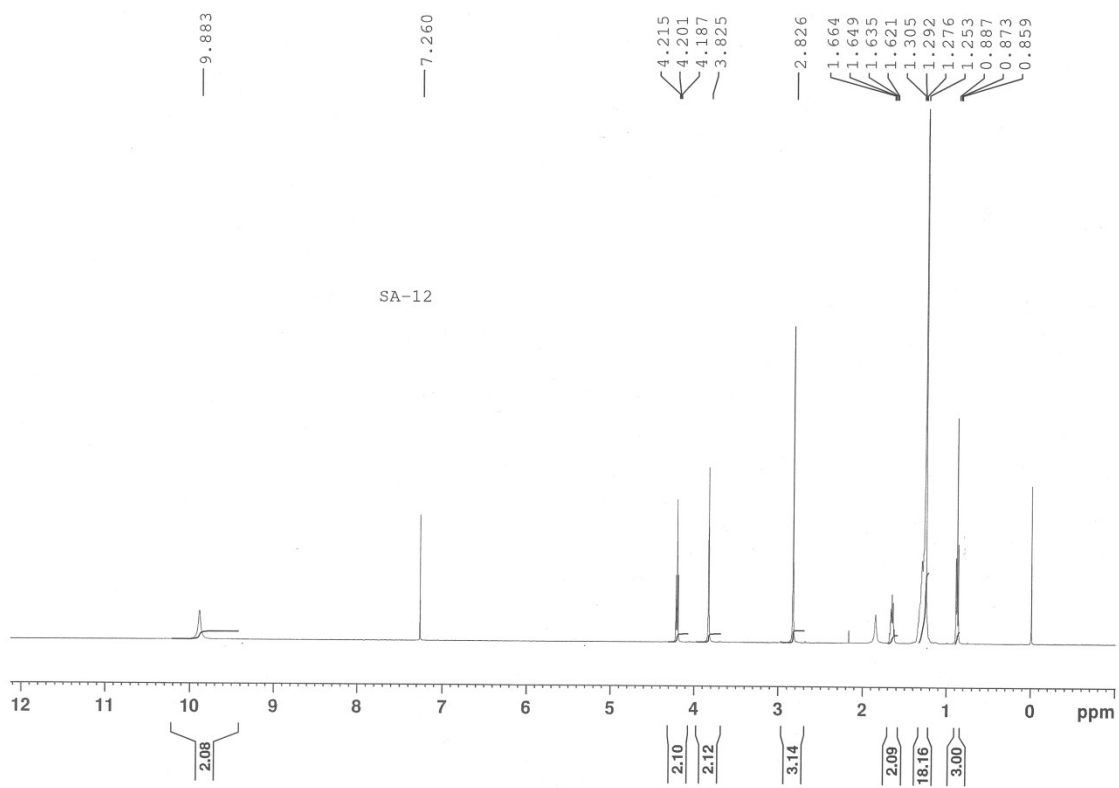

**Fig. S2.**  $^1\text{H-NMR}$  spectrum of lauryl sarcosinate hydrochloride recorded at room temperature (solvent:  $\text{CDCl}_3$ ).

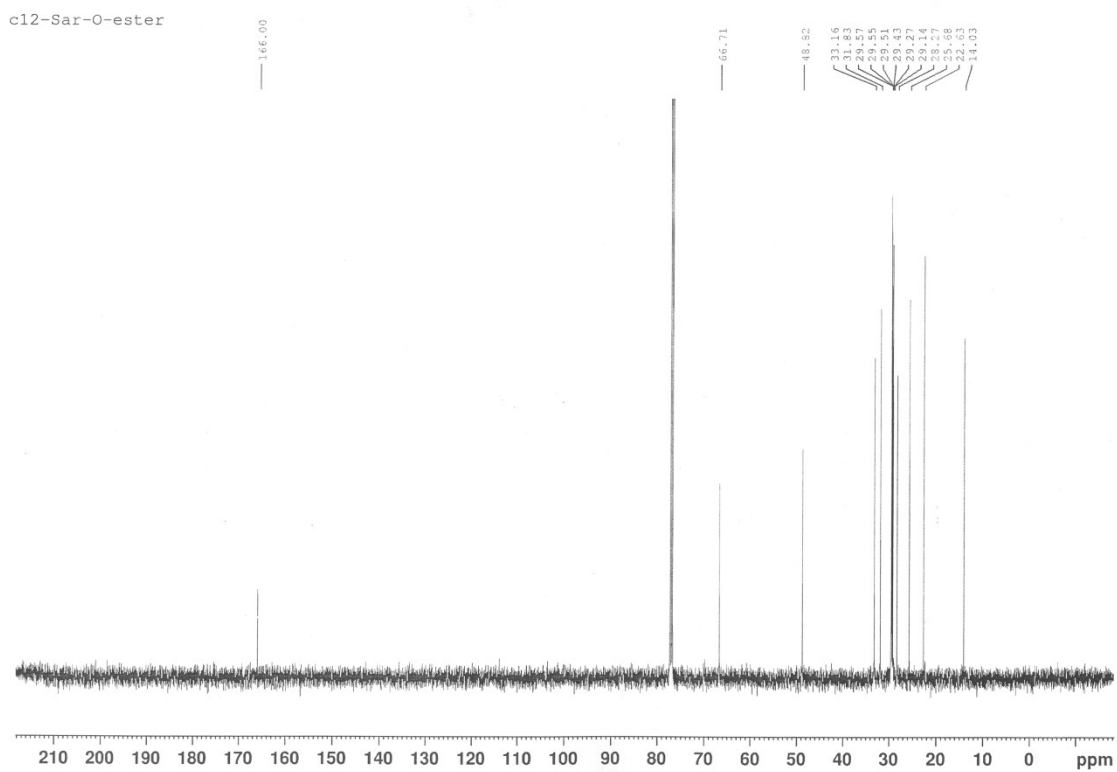

**Fig. S3.**  $^{13}\text{C}$ -NMR spectrum of lauryl sarcosinate hydrochloride recorded at room temperature (solvent:  $\text{CDCl}_3$ ).

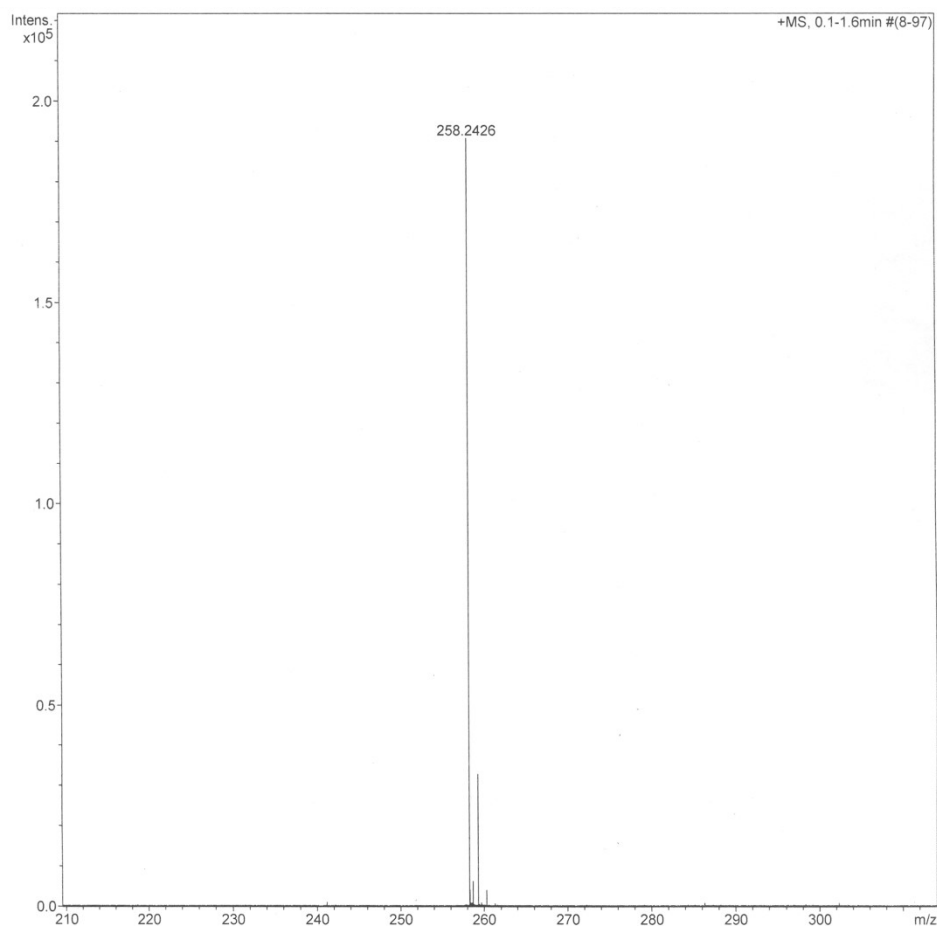

**Fig. S4.** ESI mass spectrum of lauryl sarcosinate hydrochloride. The molecular weight estimated from the molecular ion peak ( $m/z = 258.2426$ ) very closely matches the formula weight of 258.2433 (lauryl sarcosinate cation, molecular formula  $C_{15}H_{32}NO_2$ ).



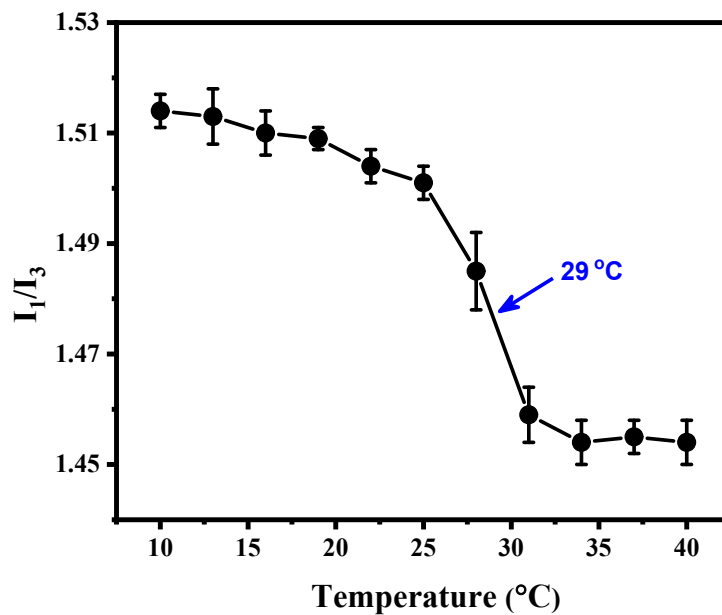

**Fig. S5.** Temperature dependence polarity ratio ( $I_1/I_3$ ) of pyrene probe in LS-DS liposomes suspended in 20 mM sodium phosphate buffer pH 7.

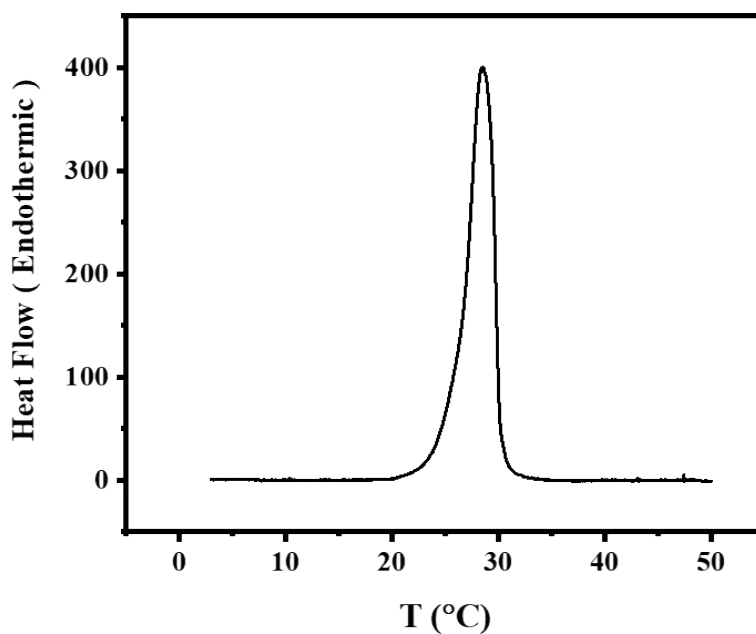

**Fig. S6.** DSC thermogram of LS-DS liposomes suspended in water.

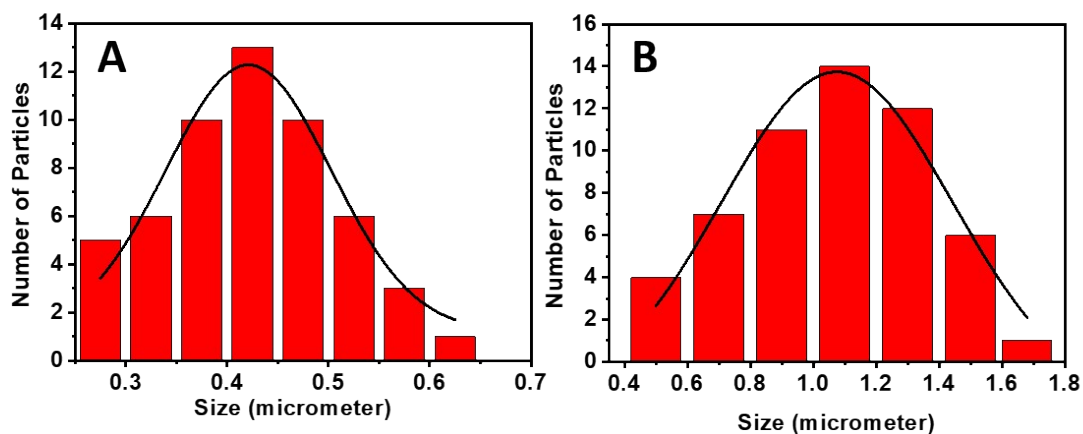

**Fig. S7.** Size distribution of (A) LS-DS vesicles and (B) LS-DS-R6G vesicles, obtained from AFM studies. The black solid lines correspond to Gaussian fits of the experimental data.

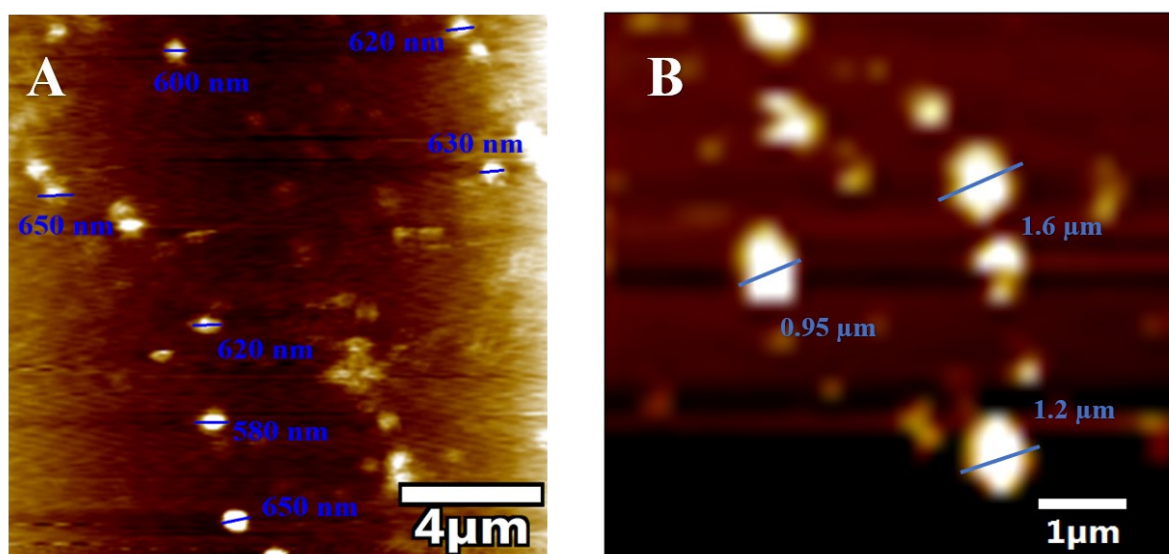

**Fig. S8.** AFM images of (A) LS-DS vesicles and (B) LS-DS-R6G vesicles in the hydrated state at pH 7.0. Images were obtained using a liquid cell.

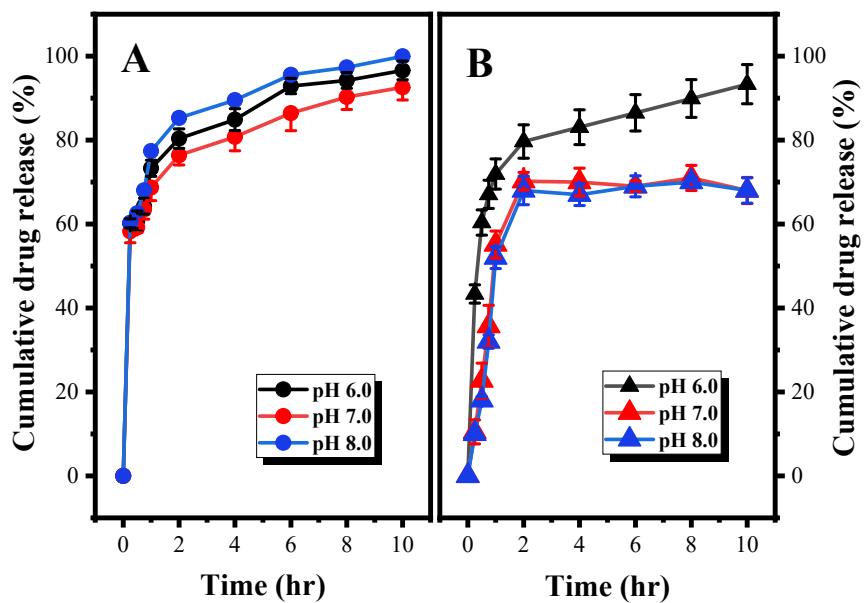

**Figure S9.** Release profiles of (A) free 5-FU and (B) free R6G at pH 6.0, pH 7.0 and 8.0.
